# Supplementary material
Source: PubMed Central journal article supplement (PMC3372946)
Supplement: supp_blood-2009-09-244145_Document1.pdf [file supp_blood-2009-09-244145_Document1.pdf]

**Table S1. Univariable and multivariable models for overall survival with all parameters that were analyzed**

| Variable                 | N  | Univariable Model |            |         | Multivariable Model* |            |         |
|--------------------------|----|-------------------|------------|---------|----------------------|------------|---------|
|                          |    | HR                | 95% CI     | p-value | HR                   | 95% CI     | p-value |
| viremia (pos vs. neg)    | 27 | 3.72              | 0.91-15.06 | 0.07    | 3.22                 | 0.77-13.44 | 0.11    |
| ELISpot                  | 25 | 0.41              | 0.18-0.94  | 0.03    | 0.29                 | 0.11-0.81  | 0.02    |
| WBC                      | 27 | 0.34              | 0.01-10.86 | 0.54    | 0.78                 | 0.02-41.61 | 0.90    |
| aPBL                     | 27 | 0.14              | 0.02-0.96  | 0.04    | 0.17                 | 0.02-1.39  | 0.10    |
| aCD45                    | 27 | 0.41              | 0.05-3.41  | 0.41    | 0.68                 | 0.06-7.45  | 0.75    |
| aCD3                     | 27 | 0.20              | 0.06-0.71  | 0.01    | 0.19                 | 0.04-0.84  | 0.03    |
| aCD4                     | 27 | 0.21              | 0.06-0.76  | 0.02    | 0.20                 | 0.05-0.92  | 0.04    |
| aCD4+25+                 | 27 | 0.19              | 0.03-1.23  | 0.08    | 0.21                 | 0.03-1.59  | 0.13    |
| aCD4+45RA+               | 27 | 0.32              | 0.09-1.12  | 0.08    | 0.41                 | 0.11-1.55  | 0.19    |
| aCD4+45RO+               | 27 | 0.17              | 0.04-0.65  | 0.01    | 0.18                 | 0.04-0.82  | 0.03    |
| aCD8                     | 27 | 0.32              | 0.12-0.87  | 0.03    | 0.33                 | 0.12-0.94  | 0.04    |
| aCD8+45RA+               | 27 | 0.30              | 0.10-0.88  | 0.03    | 0.35                 | 0.12-1.05  | 0.06    |
| aCD8+45RO+               | 27 | 0.36              | 0.13-1.01  | 0.05    | 0.35                 | 0.12-1.03  | 0.06    |
| aCD19                    | 27 | 0.84              | 0.35-2.04  | 0.70    | 1.00                 | 0.38-2.64  | 0.99    |
| aCD20                    | 27 | 0.80              | 0.35-1.81  | 0.59    | 0.93                 | 0.38-2.27  | 0.88    |
| aCD56+16+                | 27 | 0.60              | 0.20-1.83  | 0.37    | 0.47                 | 0.14-1.59  | 0.22    |
| aCD14                    | 27 | 0.98              | 0.15-6.47  | 0.98    | 1.42                 | 0.17-11.78 | 0.74    |
| TREC **(?2000 vs. <2000) | 22 | <0.001            | 0.00-      | 0.005   |                      |            |         |

HR: hazard ratio for one unit change on log10 scale except viremia and TREC

\* Adjusted for patient's age, sex mismatch between patient and cords, and risk status at time of transplantation

\*\* due to the small sample size, the multivariable result is not shown. All patients who died had TREC < 2000. The upper 95% CI is not estimable.

**Table S2. Univariable and multivariable models for progression free survival with all parameters that were analyzed**

| Variable                          | N  | Univariable Model |            |         | Multivariable Model* |             |         |
|-----------------------------------|----|-------------------|------------|---------|----------------------|-------------|---------|
|                                   |    | HR                | 95% CI     | p-value | HR                   | 95% CI      | p-value |
| viremia (pos vs. neg)             | 27 | 0.84              | 0.30-2.34  | 0.74    | 0.83                 | 0.29-2.40   | 0.73    |
| ELISpot                           | 25 | 0.54              | 0.33-0.90  | 0.02    | 0.50                 | 0.28-0.89   | 0.02    |
| WBC                               | 27 | 1.78              | 0.12-27.19 | 0.68    | 5.50                 | 0.19-157.06 | 0.32    |
| aPBL                              | 27 | 0.94              | 0.19-4.64  | 0.94    | 1.01                 | 0.20-5.04   | 0.99    |
| aCD45                             | 27 | 1.47              | 0.22-9.74  | 0.69    | 2.60                 | 0.29-23.43  | 0.39    |
| aCD3                              | 27 | 0.75              | 0.31-1.81  | 0.52    | 0.72                 | 0.29-1.78   | 0.48    |
| aCD4                              | 27 | 0.60              | 0.23-1.60  | 0.31    | 0.59                 | 0.22-1.59   | 0.30    |
| aCD4+25+                          | 27 | 0.33              | 0.09-1.29  | 0.11    | 0.35                 | 0.09-1.38   | 0.13    |
| aCD4+45RA+                        | 27 | 0.76              | 0.35-1.64  | 0.48    | 0.75                 | 0.33-1.71   | 0.49    |
| aCD4+45RO+                        | 27 | 0.56              | 0.20-1.55  | 0.26    | 0.52                 | 0.19-1.47   | 0.22    |
| aCD8                              | 27 | 0.86              | 0.43-1.71  | 0.67    | 0.80                 | 0.39-1.63   | 0.54    |
| aCD8+45RA+                        | 27 | 0.89              | 0.45-1.75  | 0.73    | 0.82                 | 0.40-1.68   | 0.59    |
| aCD8+45RO+                        | 27 | 1.03              | 0.51-2.07  | 0.94    | 0.93                 | 0.44-1.97   | 0.85    |
| aCD19                             | 27 | 1.39              | 0.63-3.07  | 0.42    | 1.60                 | 0.69-3.73   | 0.29    |
| aCD20                             | 27 | 1.33              | 0.63-2.84  | 0.46    | 1.51                 | 0.68-3.37   | 0.31    |
| aCD56+16+                         | 27 | 0.35              | 0.15-0.82  | 0.02    | 0.32                 | 0.13-0.81   | 0.02    |
| aCD14                             | 27 | 2.13              | 0.41-11.01 | 0.37    | 2.96                 | 0.44-20.00  | 0.27    |
| TREC ( $\geq 2000$ vs. $< 2000$ ) | 22 | 0.39              | 0.09-1.67  | 0.21    | 0.49                 | 0.08-2.86   | 0.43    |

HR: hazard ratio for one unit change on log10 scale except viremia and TREC

\*Adjusted for patient's age, sex mismatch between patient and cords, and risk status at time of transplantation
